# Supplementary material for: Impact of selective serotonin reuptake inhibitors in the veteran population: 10-year risk outcomes
Source: Atypon-hosted journal article supplement (doi:10.2217/cer-2018-0085), 2019-03-11
Supplement: suppl_file.docx [file suppl_file.docx]

**Supplementary Tables**

**Table S1**. Results of sensitivity analysis: Comparison of relative risks of outcomes using

original exposure (30+ days SSRI exposure in Fiscal Year 2003-2004) and modified exposure

(≥ 6 months SSRI exposure) criterion in comparison to those who were SSRI-naïve

|  |  |  | **Main analysis**  ***30+ days SSRI exposure*** | | **Sensitivity Analysis *≥ 6 months SSRI exposure*** | |
| --- | --- | --- | --- | --- | --- | --- |
|  |  |  | RR | 95% CI | RR | 95% CI |
| **Hip Fracture** | |  |  |  |  |  |
|  | Year 2 |  | 1.427 | (1.261 – 1.615) | 1.462 | (1.278 – 1.673) |
|  | Year 5 |  | 1.668 | (1.525 – 1.824) | 1.699 | (1.543 – 1.870) |
|  | Year 10 |  | 1.567 | (1.464 – 1.676) | 1.609 | (1.498 – 1.729) |
|  |  |  |  |  |  |  |
| **Osteoporosis** | |  |  |  |  |  |
|  | Year 2 |  | 1.280 | (1.240 – 1.321) | 1.310 | (1.266 – 1.355) |
|  | Year 5 |  | 1.356 | (1.325 – 1.388) | 1.377 | (1.343 – 1.412) |
|  | Year 10 |  | 1.346 | (1.319 – 1.374) | 1.367 | (1.337 – 1.397) |
| *NOTE.* The point estimates for the relative risk (RR) of suffering a hip fracture or being diagnosed with osteoporosis, along with 95% confidence intervals.  Variables used to control for potential confounding differences between these cohorts included: Age category (18-29, 30-39, 40-49, 50-59, 60-69, 70-89), sex, race (Black, White, Other), marital status, Charlson score, weight category (normal/overweight, obese, morbidly obese), catastrophic disability, alcohol dependence, and tobacco use disorder. | | | | | | |

**Table S2**. Hip fracture, year 2: Parameter estimates and relative risks

|  |  |  |  |  |  |
| --- | --- | --- | --- | --- | --- |
| Independent variable | β | SE | *p* value | Relative Risk | 95% CI |
| Intercept | -8.372 | 0.160 | <0.001 | — | — |
| SSRI Exposed | 0.356 | 0.061 | <0.001 | 1.427 | (1.261 - 1.615) |
| Charlson | 0.276 | 0.017 | <0.001 | 1.318 | (1.279 - 1.358) |
| Catastrophically Disabled | 0.935 | 0.177 | <0.001 | 2.545 | (1.796 - 3.606) |
| Race |  |  |  |  |  |
| White | *Ref.* | — | — | — | — |
| Black | -0.391 | 0.102 | <0.001 | 0.677 | (0.551 - 0.831) |
| Other | 0.026 | 0.068 | 0.696 | 1.027 | (0.899 - 1.173) |
| Age |  |  |  |  |  |
| 18-29 | *Ref.* | — | — | — | — |
| 30s | -0.851 | 0.227 | <0.001 | 0.427 | (0.274 - 0.665) |
| 40s | -0.379 | 0.177 | 0.032 | 0.684 | (0.484 - 0.967) |
| 50s | 0.009 | 0.164 | 0.956 | 1.009 | (0.735 - 1.386) |
| 60s | 0.357 | 0.164 | 0.030 | 1.430 | (1.038 - 1.970) |
| 70s-80s | 0.581 | 0.167 | 0.001 | 1.787 | (1.287 - 2.481) |
| Married | -0.669 | 0.061 | <0.001 | 0.512 | (0.454 - 0.579) |
| Male | -0.165 | 0.155 | 0.289 | 0.848 | (0.624 - 1.152) |
| Weight Category |  |  |  |  |  |
| Normal/Overweight | *Ref.* | — | — | — | — |
| Obese | -0.517 | 0.131 | <0.001 | 0.596 | (0.461 - 0.771) |
| Morbidly Obese | -0.229 | 0.355 | 0.518 | 0.795 | (0.397 - 1.593) |
| Alcohol dependence | 0.623 | 0.112 | <0.001 | 1.863 | (1.488 - 2.334) |
| Tobacco use disorder | 0.206 | 0.084 | 0.014 | 1.229 | (1.039 - 1.454) |
|  | | | | | |

**Table S3**. Hip fracture, year 5: Parameter estimates and relative risks

|  |  |  |  |  |  |
| --- | --- | --- | --- | --- | --- |
| Independent variable | β | SE | *p* value | Relative Risk | 95% CI |
| Intercept | -7.850 | 0.124 | <0.001 | — | — |
| SSRI Exposed | 0.512 | 0.044 | <0.001 | 1.668 | (1.525 - 1.824) |
| Charlson | 0.273 | 0.013 | <0.001 | 1.313 | (1.282 - 1.344) |
| Catastrophically Disabled | 0.950 | 0.122 | <0.001 | 2.580 | (2.030 - 3.280) |
| Race |  |  |  |  |  |
| White | *Ref.* | — | — | — | — |
| Black | -0.540 | 0.075 | <0.001 | 0.583 | (0.502 - 0.676) |
| Other | -0.062 | 0.052 | 0.229 | 0.939 | (0.849 - 1.040) |
| Age |  |  |  |  |  |
| 18-29 | *Ref.* | — | — | — | — |
| 30s | -0.526 | 0.162 | 0.001 | 0.591 | (0.431 - 0.813) |
| 40s | -0.205 | 0.135 | 0.130 | 0.815 | (0.625 - 1.063) |
| 50s | 0.324 | 0.126 | 0.010 | 1.383 | (1.081 - 1.769) |
| 60s | 0.511 | 0.128 | <0.001 | 1.667 | (1.297 - 2.141) |
| 70s-80s | 0.861 | 0.130 | <0.001 | 2.364 | (1.830 - 3.054) |
| Married | -0.681 | 0.044 | <0.001 | 0.507 | (0.464 - 0.553) |
| Male | -0.111 | 0.107 | 0.300 | 0.895 | (0.723 - 1.108) |
| Weight Category |  |  |  |  |  |
| Normal/Overweight | *Ref.* | — | — | — | — |
| Obese | -0.333 | 0.086 | <0.001 | 0.717 | (0.607 - 0.848) |
| Morbidly Obese | -1.006 | 0.379 | 0.008 | 0.366 | (0.174 - 0.768) |
| Alcohol dependence | 0.626 | 0.078 | <0.001 | 1.867 | (1.600 - 2.179) |
| Tobacco use disorder | 0.378 | 0.058 | <0.001 | 1.458 | (1.302 - 1.633) |
|  | | | | | |

**Table S4**. Hip fracture, year 10: Parameter estimates and relative risks

|  |  |  |  |  |  |
| --- | --- | --- | --- | --- | --- |
| Independent variable | β | SE | *p* value | Relative Risk | 95% CI |
| Intercept | -7.379 | 0.111 | <0.001 | — | — |
| SSRI Exposed | 0.450 | 0.033 | <0.001 | 1.567 | (1.464 - 1.676) |
| Charlson | 0.216 | 0.012 | <0.001 | 1.240 | (1.213 - 1.268) |
| Catastrophically Disabled | 1.208 | 0.082 | <0.001 | 3.326 | (2.832 - 3.905) |
| Race |  |  |  |  |  |
| White | *Ref.* | — | — | — | — |
| Black | -0.488 | 0.053 | <0.001 | 0.615 | (0.553 - 0.683) |
| Other | -0.250 | 0.045 | <0.001 | 0.779 | (0.713 - 0.852) |
| Age |  |  |  |  |  |
| 18-29 | *Ref.* | — | — | — | — |
| 30s | -0.099 | 0.134 | 0.459 | 0.906 | (0.697 - 1.177) |
| 40s | 0.374 | 0.116 | 0.001 | 1.453 | (1.158 - 1.824) |
| 50s | 0.827 | 0.111 | <0.001 | 2.285 | (1.839 - 2.839) |
| 60s | 0.998 | 0.113 | <0.001 | 2.710 | (2.170 - 3.386) |
| 70s-80s | 1.397 | 0.115 | <0.001 | 4.037 | (3.219 - 5.061) |
| Married | -0.622 | 0.033 | <0.001 | 0.537 | (0.503 - 0.574) |
| Male | -0.056 | 0.077 | 0.462 | 0.945 | (0.811 - 1.101) |
| Weight Category |  |  |  |  |  |
| Normal/Overweight | *Ref.* | — | — | — | — |
| Obese | -0.309 | 0.065 | <0.001 | 0.734 | (0.647 - 0.833) |
| Morbidly Obese | -0.055 | 0.187 | 0.770 | 0.947 | (0.657 - 1.365) |
| Alcohol dependence | 0.636 | 0.060 | <0.001 | 1.885 | (1.674 - 2.122) |
| Tobacco use disorder | 0.327 | 0.045 | <0.001 | 1.386 | (1.268 - 1.515) |
|  | | | | | |

**Table S5**. Osteoporosis, year 2: Parameter estimates and relative risks

|  |  |  |  |  |  |
| --- | --- | --- | --- | --- | --- |
| Independent variable | β | SE | *p* value | Relative Risk | 95% CI |
| Intercept | -9.459 | 0.147 | <0.001 | — | — |
| SSRI Exposed | 0.250 | 0.016 | <0.001 | 1.280 | (1.240 - 1.321) |
| Charlson | 0.235 | 0.005 | <0.001 | 1.259 | (1.248 - 1.269) |
| Catastrophically Disabled | 0.312 | 0.060 | <0.001 | 1.359 | (1.208 - 1.528) |
| Race |  |  |  |  |  |
| White | *Ref.* | — | — | — | — |
| Black | -0.839 | 0.034 | <0.001 | 0.436 | (0.408 - 0.466) |
| Other | -0.085 | 0.017 | <0.001 | 0.920 | (0.890 - 0.952) |
| Age |  |  |  |  |  |
| 18-29 | *Ref.* | — | — | — | — |
| 30s | 0.965 | 0.163 | <0.001 | 2.621 | (1.903 - 3.609) |
| 40s | 2.241 | 0.149 | <0.001 | 9.337 | (6.974 - 12.502) |
| 50s | 3.298 | 0.147 | <0.001 | 26.470 | (19.825 - 35.340) |
| 60s | 3.997 | 0.147 | <0.001 | 52.835 | (39.561 - 70.562) |
| 70s-80s | 4.427 | 0.147 | <0.001 | 80.816 | (60.484 - 107.983) |
| Married | 0.014 | 0.016 | 0.366 | 1.015 | (0.985 - 1.047) |
| Male | 2.260 | 0.022 | <0.001 | 9.198 | (8.805 - 9.609) |
| Weight Category |  |  |  |  |  |
| Normal/Overweight | *Ref.* | — | — | — | — |
| Obese | -0.651 | 0.034 | <0.001 | 0.525 | (0.491 - 0.561) |
| Morbidly Obese | -0.550 | 0.104 | <0.001 | 0.581 | (0.475 - 0.711) |
| Alcohol dependence | 0.203 | 0.043 | <0.001 | 1.223 | (1.125 - 1.328) |
| Tobacco use disorder | 0.243 | 0.023 | <0.001 | 1.271 | (1.214 - 1.329) |
|  | | | | | |

**Table S6**. Osteoporosis, year 5: Parameter estimates and relative risks

|  |  |  |  |  |  |
| --- | --- | --- | --- | --- | --- |
| Independent variable | β | SE | *p* value | Relative Risk | 95% CI |
| Intercept | -8.539 | 0.100 | <0.001 | — | — |
| SSRI Exposed | 0.311 | 0.012 | <0.001 | 1.356 | (1.325 - 1.388) |
| Charlson | 0.255 | 0.004 | <0.001 | 1.278 | (1.270 - 1.287) |
| Catastrophically Disabled | 0.430 | 0.042 | <0.001 | 1.516 | (1.400 - 1.642) |
| Race |  |  |  |  |  |
| White | *Ref.* | — | — | — | — |
| Black | -0.695 | 0.023 | <0.001 | 0.506 | (0.484 - 0.529) |
| Other | -0.078 | 0.014 | <0.001 | 0.927 | (0.903 - 0.952) |
| Age |  |  |  |  |  |
| 18-29 | *Ref.* | — | — | — | — |
| 30s | 1.010 | 0.110 | <0.001 | 2.729 | (2.202 - 3.382) |
| 40s | 2.257 | 0.101 | <0.001 | 9.389 | (7.709 - 11.436) |
| 50s | 3.204 | 0.100 | <0.001 | 23.593 | (19.400 - 28.691) |
| 60s | 3.811 | 0.100 | <0.001 | 42.769 | (35.157 - 52.029) |
| 70s-80s | 4.204 | 0.100 | <0.001 | 62.906 | (51.688 - 76.559) |
| Married | -0.034 | 0.012 | 0.005 | 0.970 | (0.948 - 0.992) |
| Male | 2.135 | 0.017 | <0.001 | 7.892 | (7.643 - 8.150) |
| Weight Category |  |  |  |  |  |
| Normal/Overweight | *Ref.* | — | — | — | — |
| Obese | -0.585 | 0.025 | <0.001 | 0.564 | (0.538 - 0.592) |
| Morbidly Obese | -0.629 | 0.081 | <0.001 | 0.541 | (0.462 - 0.633) |
| Alcohol dependence | 0.188 | 0.031 | <0.001 | 1.203 | (1.133 - 1.277) |
| Tobacco use disorder | 0.306 | 0.017 | <0.001 | 1.347 | (1.304 - 1.392) |
|  | | | | | |

**Table S7**. Osteoporosis, year 10: Parameter estimates and relative risks

|  |  |  |  |  |  |
| --- | --- | --- | --- | --- | --- |
| Independent variable | β | SE | *p* value | Relative Risk | 95% CI |
| Intercept | -7.587 | 0.073 | <0.001 | — | — |
| SSRI Exposed | 0.307 | 0.011 | <0.001 | 1.346 | (1.319 - 1.374) |
| Charlson | 0.252 | 0.004 | <0.001 | 1.269 | (1.261 - 1.278) |
| Catastrophically Disabled | 0.634 | 0.034 | <0.001 | 1.824 | (1.710 - 1.945) |
| Race |  |  |  |  |  |
| White | *Ref.* | — | — | — | — |
| Black | -0.588 | 0.018 | <0.001 | 0.565 | (0.546 - 0.586) |
| Other | -0.133 | 0.014 | <0.001 | 0.880 | (0.857 - 0.903) |
| Age |  |  |  |  |  |
| 18-29 | *Ref.* | — | — | — | — |
| 30s | 1.037 | 0.080 | <0.001 | 2.792 | (2.390 - 3.262) |
| 40s | 2.213 | 0.073 | <0.001 | 8.850 | (7.664 - 10.219) |
| 50s | 2.963 | 0.073 | <0.001 | 18.187 | (15.761 - 20.987) |
| 60s | 3.458 | 0.073 | <0.001 | 29.401 | (25.465 - 33.945) |
| 70s-80s | 3.809 | 0.073 | <0.001 | 41.392 | (35.826 - 47.822) |
| Married | -0.087 | 0.011 | <0.001 | 0.921 | (0.903 - 0.940) |
| Male | 2.002 | 0.015 | <0.001 | 6.762 | (6.577 - 6.951) |
| Weight Category |  |  |  |  |  |
| Normal/Overweight | *Ref.* | — | — | — | — |
| Obese | -0.529 | 0.021 | <0.001 | 0.599 | (0.575 - 0.624) |
| Morbidly Obese | -0.628 | 0.075 | <0.001 | 0.545 | (0.472 - 0.628) |
| Alcohol dependence | 0.191 | 0.027 | <0.001 | 1.204 | (1.144 - 1.268) |
| Tobacco use disorder | 0.297 | 0.015 | <0.001 | 1.330 | (1.292 - 1.370) |
|  | | | | | |
